# Supplementary material for: Antioxidant Activity of Compounds Isolated from Elaeagnus umbellata Promotes Human Gingival Fibroblast Well-Being
Source: PubMed Central journal article supplement (PMC7997630; doi:10.1021/acs.jnatprod.9b01030), 2020-02-07

## Supporting Information

### **Antioxidant Activity of Compounds Isolated from *Elaeagnus umbellata* Promotes Human Gingival Fibroblast Well-Being**

Anna Maria Iannuzzi,<sup>†</sup> Chiara Giacomelli,<sup>†,‡</sup> Marinella De Leo,<sup>†,‡</sup> Deborah Pietrobono,<sup>†</sup> Fabiano Camangi,<sup>§</sup> Nunziatina De Tommasi,<sup>\*,<sup>‡</sup></sup> Claudia Martini,<sup>†,‡</sup> Maria Letizia Trincavelli,<sup>†,‡</sup> and Alessandra Braca<sup>†,‡</sup>

<sup>†</sup>Dipartimento di Farmacia, Università di Pisa, via Bonanno 33, 56126 Pisa, Italy

<sup>‡</sup>Centro Interdipartimentale di Ricerca "Nutraceutica e Alimentazione per la Salute", Università di Pisa, via del Borghetto 80, 56124 Pisa, Italy

<sup>§</sup>Scuola Superiore Sant'Anna di Studi Universitari e di Perfezionamento, Piazza Martiri della Libertà 33, 56127 Pisa, Italy

<sup>‡</sup>Dipartimento di Farmacia, Università degli Studi di Salerno, via Giovanni Paolo II 132, 84084 Fisciano (SA), Italy

## Table of Contents

**Figure S1.**  $^1\text{H}$  NMR spectrum of compound **1** ( $\text{CD}_3\text{OD}$ , 600 MHz)

**Figure S2.** COSY spectrum of compound **1** ( $\text{CD}_3\text{OD}$ , 600 MHz)

**Figure S3.** HSQC spectrum of compound **1** ( $\text{CD}_3\text{OD}$ , 600 MHz)

**Figure S4.** HMBC spectrum of compound **1** ( $\text{CD}_3\text{OD}$ , 600 MHz)

**Figure S5.**  $^1\text{H}$  NMR spectrum of compound **2** ( $\text{CD}_3\text{OD}$ , 600 MHz)

**Figure S6.** COSY spectrum of compound **2** ( $\text{CD}_3\text{OD}$ , 600 MHz)

**Figure S7.** HSQC spectrum of compound **2** ( $\text{CD}_3\text{OD}$ , 600 MHz)

**Figure S8.** HMBC spectrum of compound **2** ( $\text{CD}_3\text{OD}$ , 600 MHz)

**Figure S9.**  $^1\text{H}$  NMR spectrum of compound **3** ( $\text{CD}_3\text{OD}$ , 600 MHz)

**Figure S10.** COSY spectrum of compound **3** ( $\text{CD}_3\text{OD}$ , 600 MHz)

**Figure S11.** HSQC spectrum of compound **3** ( $\text{CD}_3\text{OD}$ , 600 MHz)

**Figure S12.** HMBC spectrum of compound **3** ( $\text{CD}_3\text{OD}$ , 600 MHz)

**Figure S13.**  $^1\text{H}$  NMR spectrum of compound **4** ( $\text{CD}_3\text{OD}$ , 600 MHz)

**Figure S14.** COSY spectrum of compound **4** ( $\text{CD}_3\text{OD}$ , 600 MHz)

**Figure S15.** HSQC spectrum of compound **4** ( $\text{CD}_3\text{OD}$ , 600 MHz)

**Figure S16.** HMBC spectrum of compound **4** ( $\text{CD}_3\text{OD}$ , 600 MHz)

**Figure S17.**  $^1\text{H}$  NMR spectrum of compound **5** ( $\text{CD}_3\text{OD}$ , 600 MHz)

**Figure S18.** COSY spectrum of compound **5** ( $\text{CD}_3\text{OD}$ , 600 MHz)

**Figure S19.** HSQC spectrum of compound **5** ( $\text{CD}_3\text{OD}$ , 600 MHz)

**Figure S20.** HMBC spectrum of compound **5** ( $\text{CD}_3\text{OD}$ , 600 MHz)

**Figure S1.**

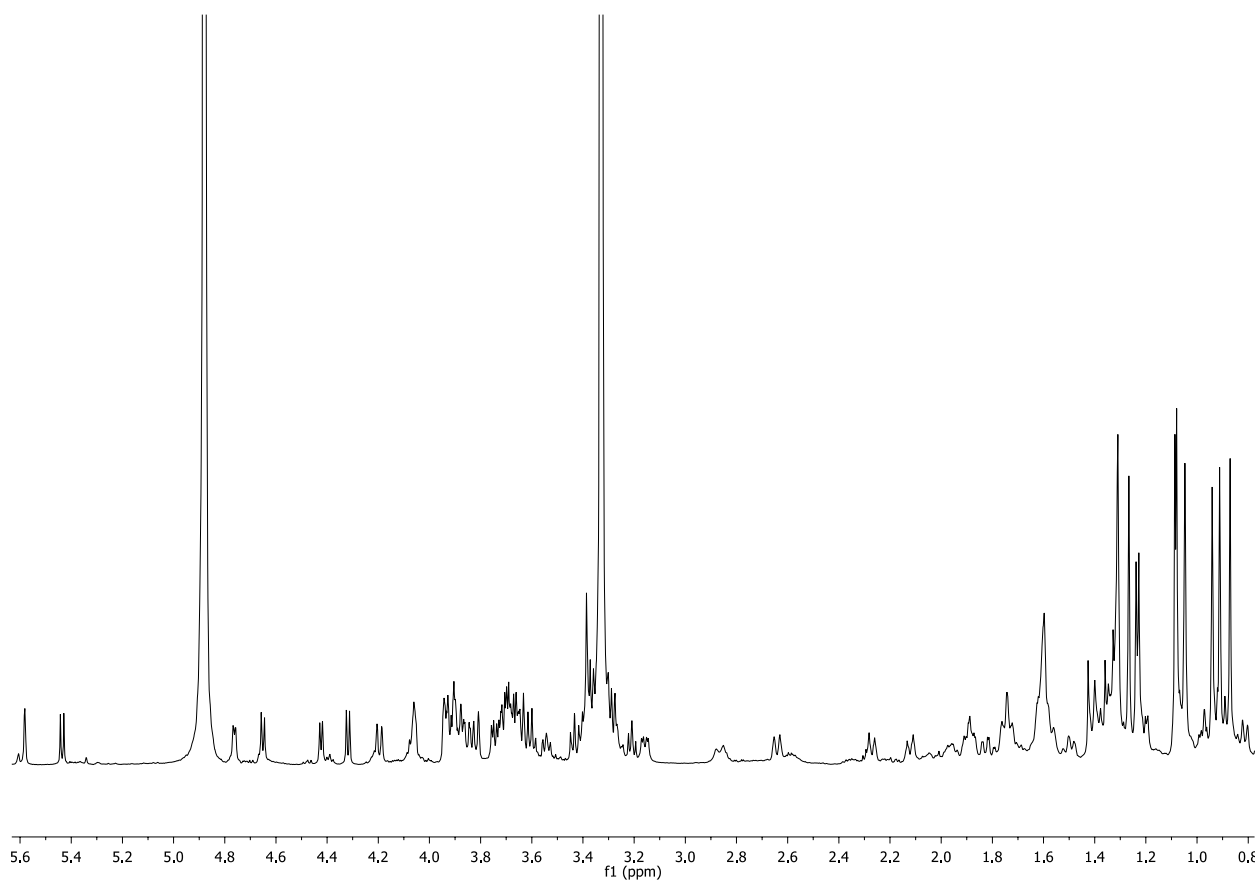

**Figure S2.**

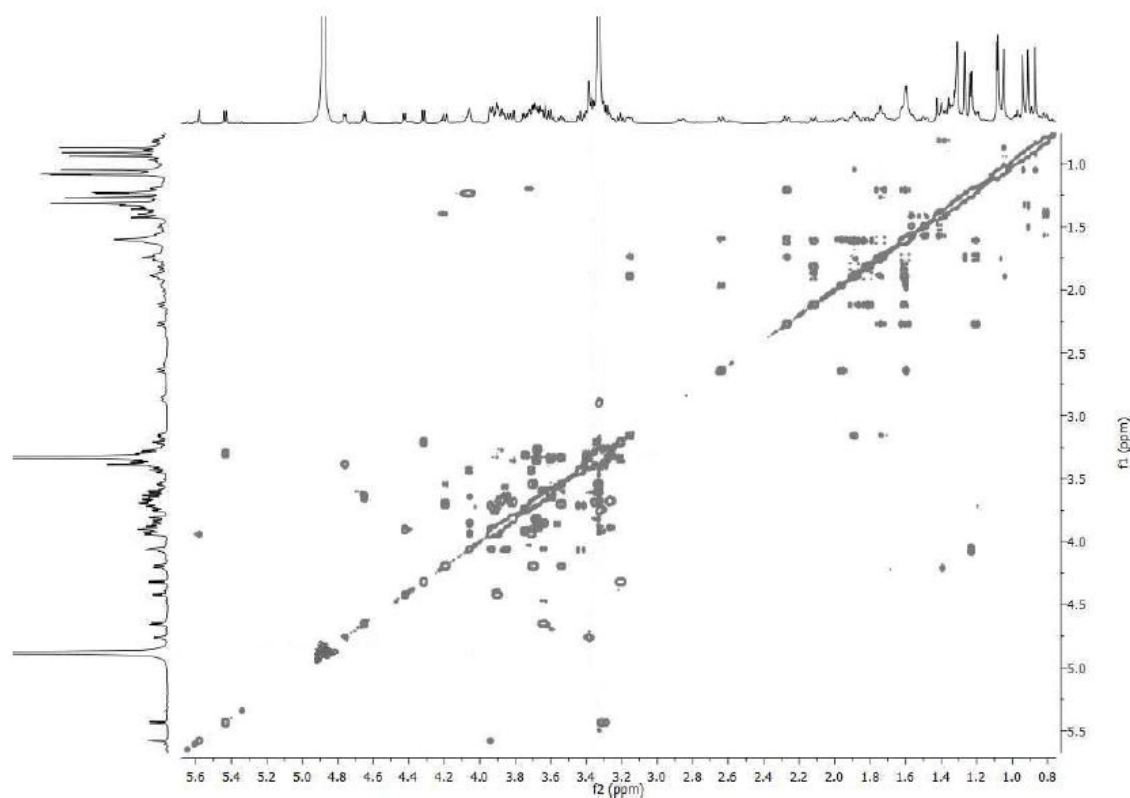

Figure S3.

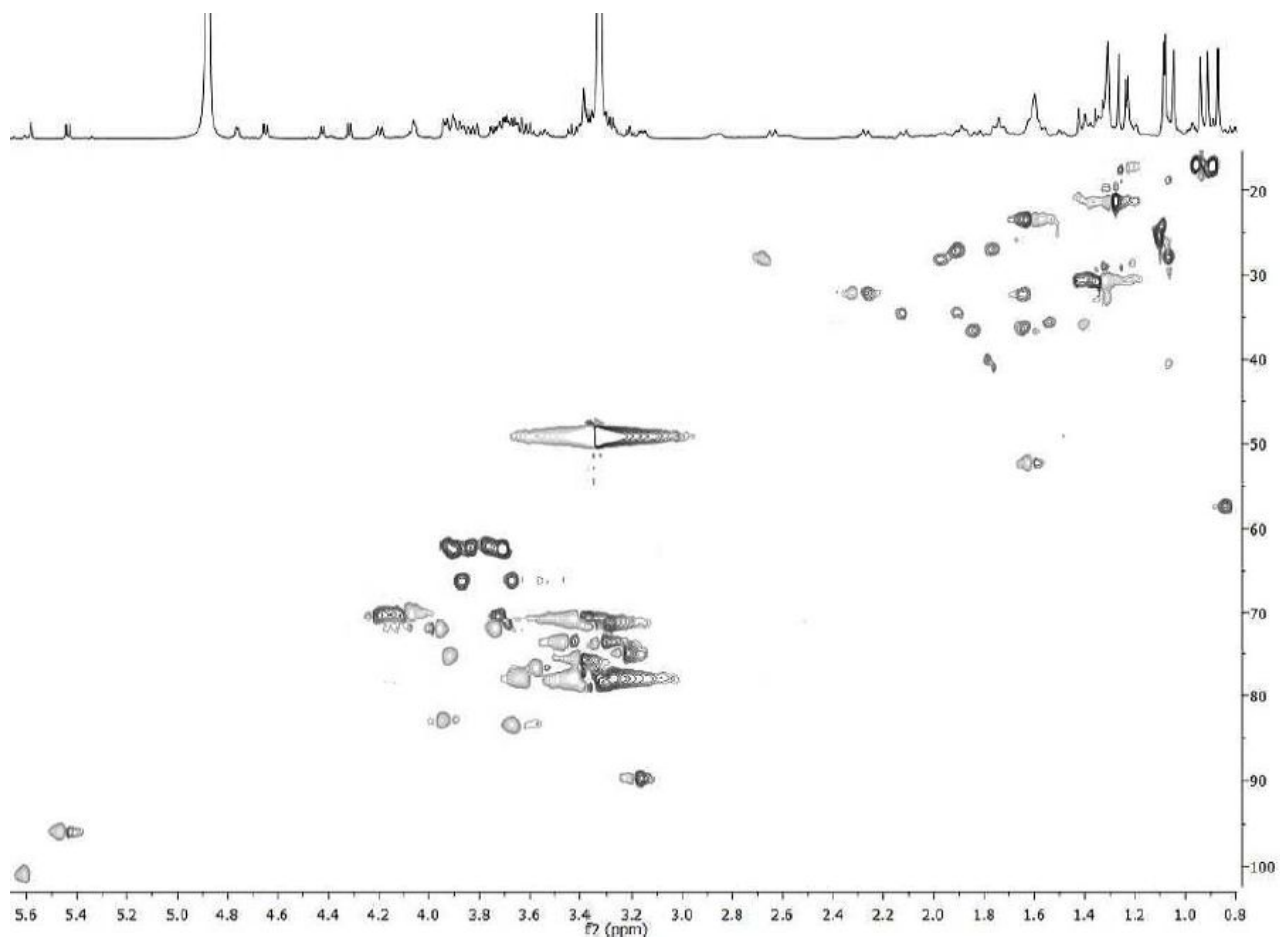

Figure S4.

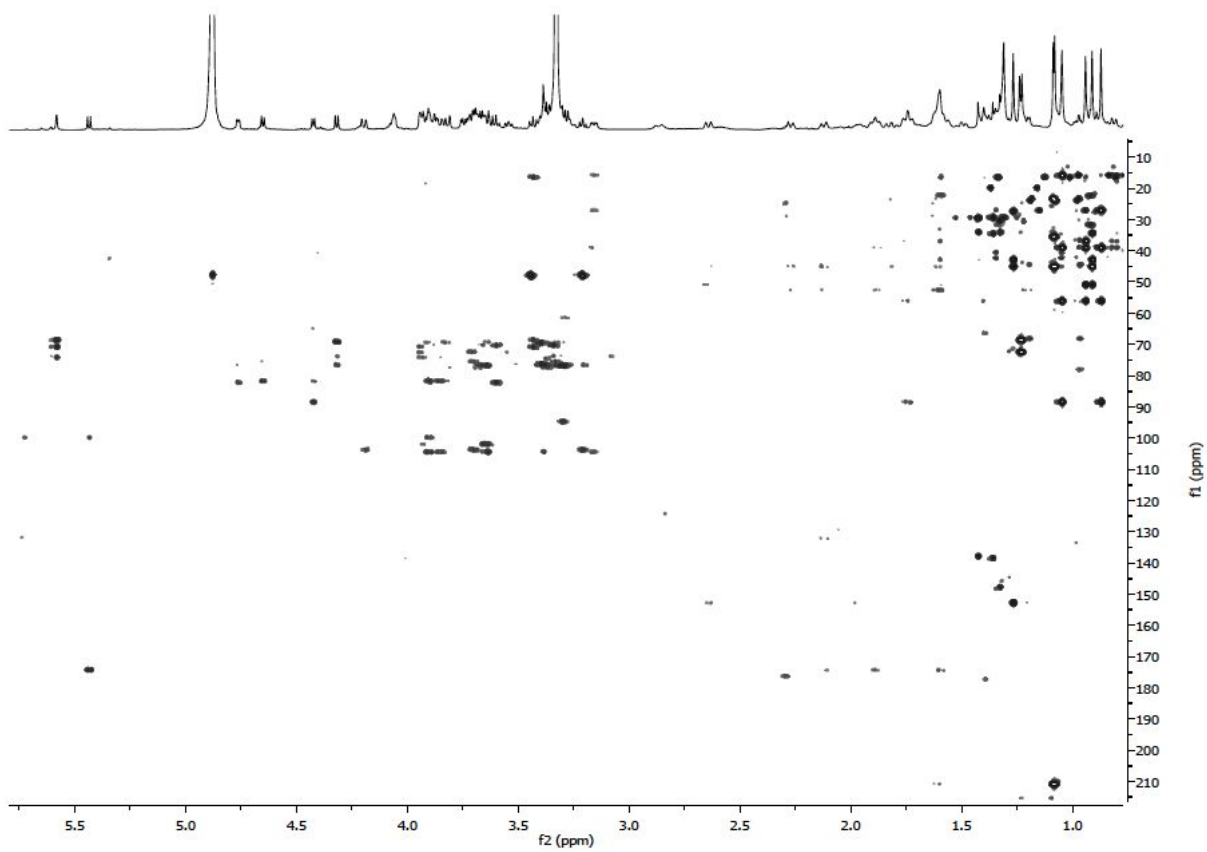

**Figure S5.**

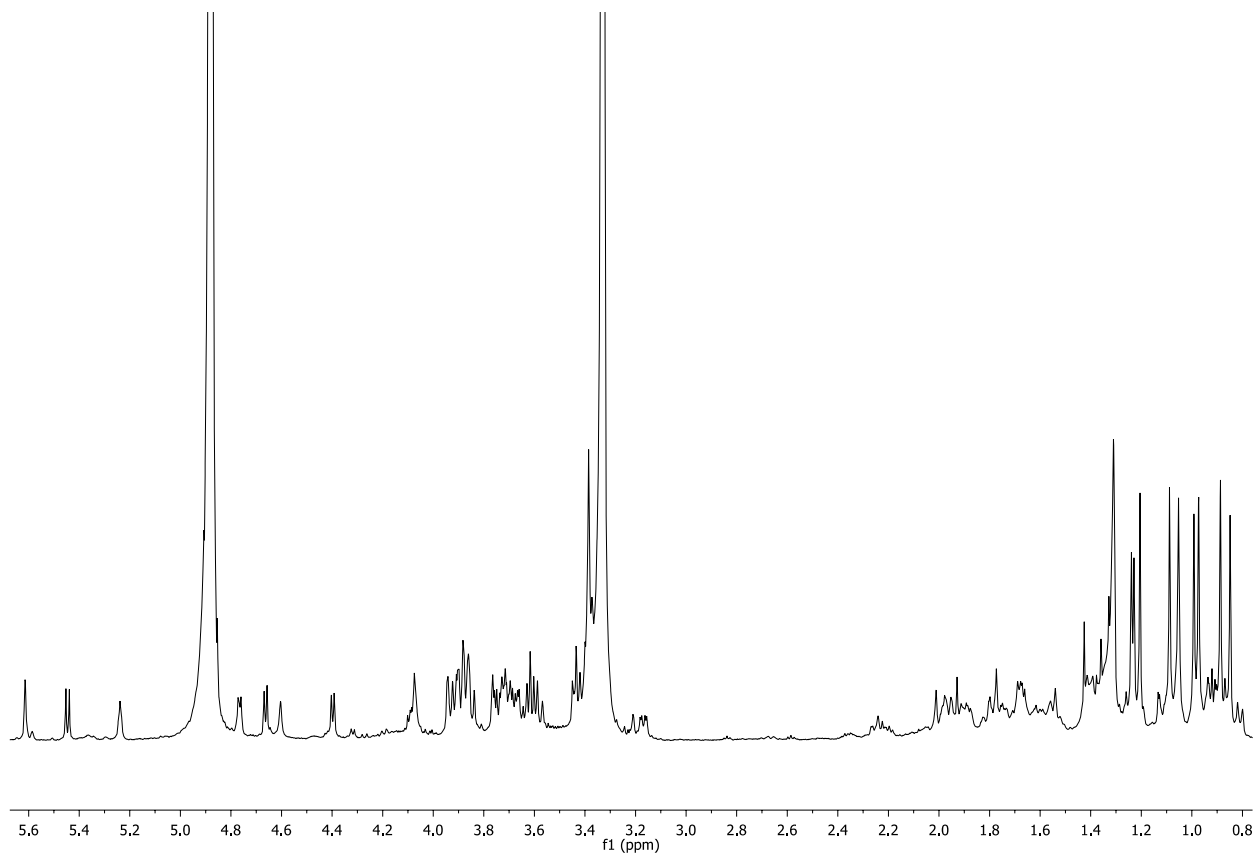

**Figure S6.**

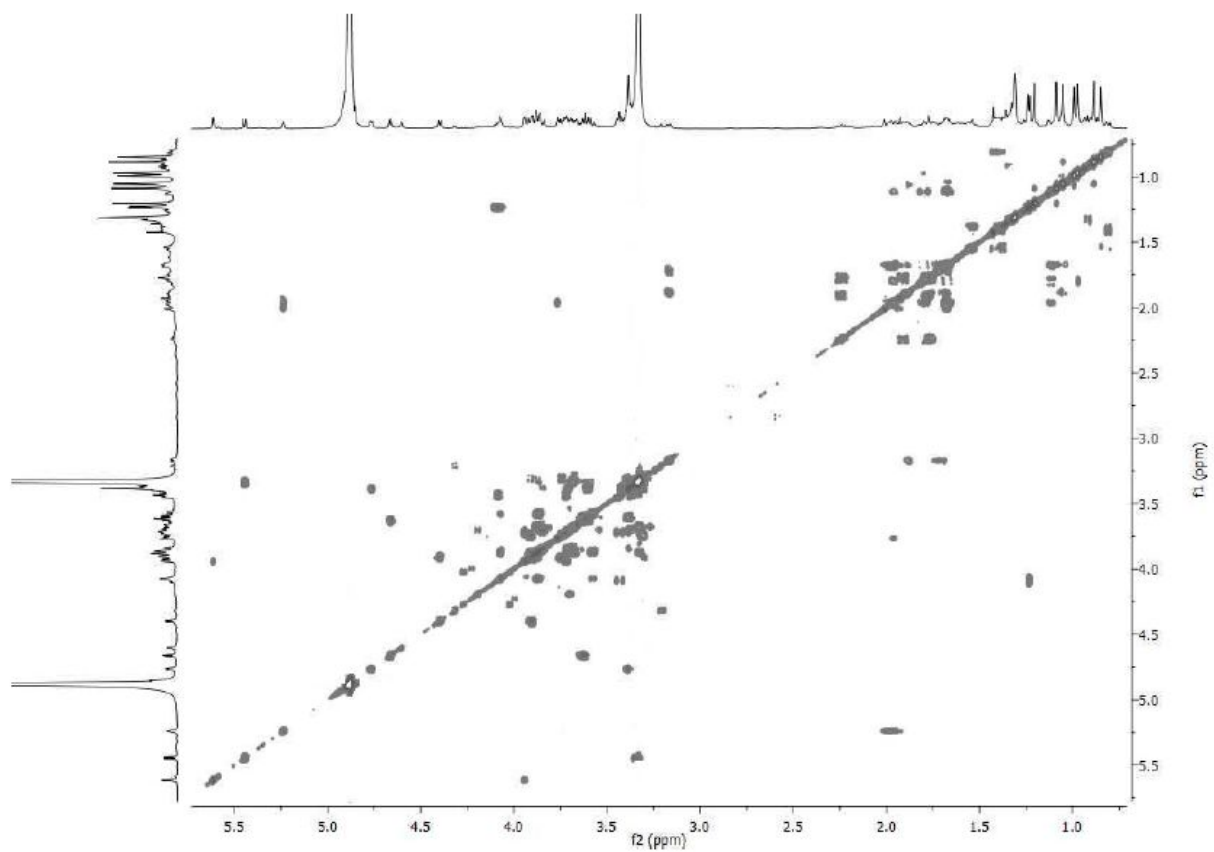

Figure S7.

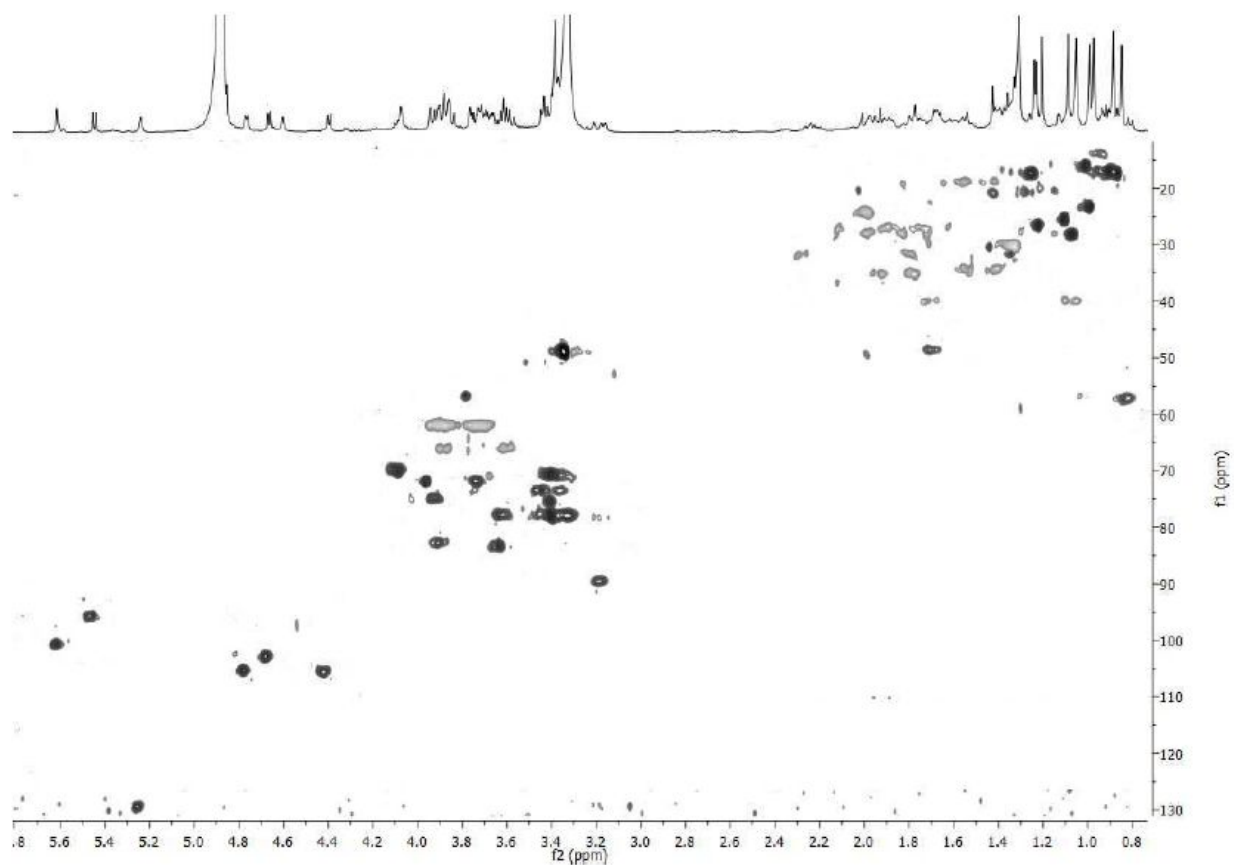

Figure S8.

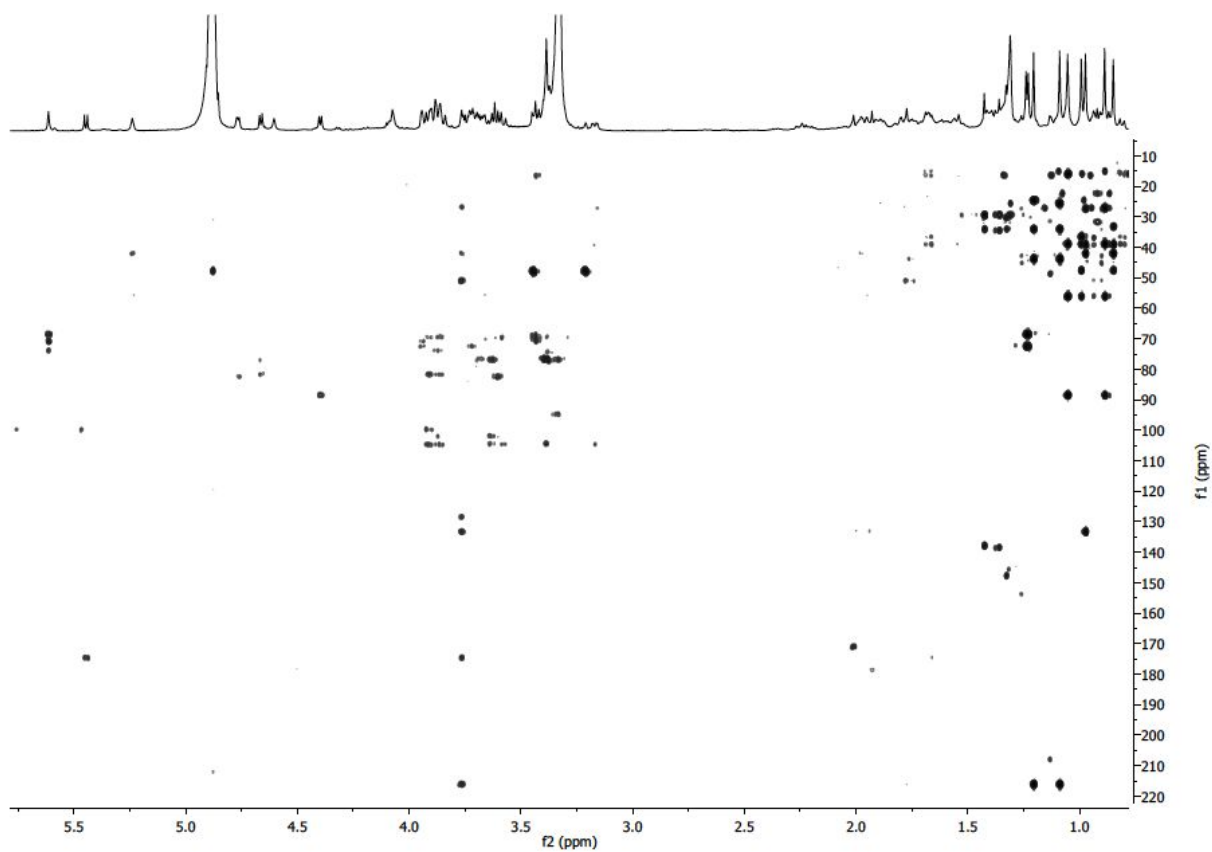

**Figure S9.**

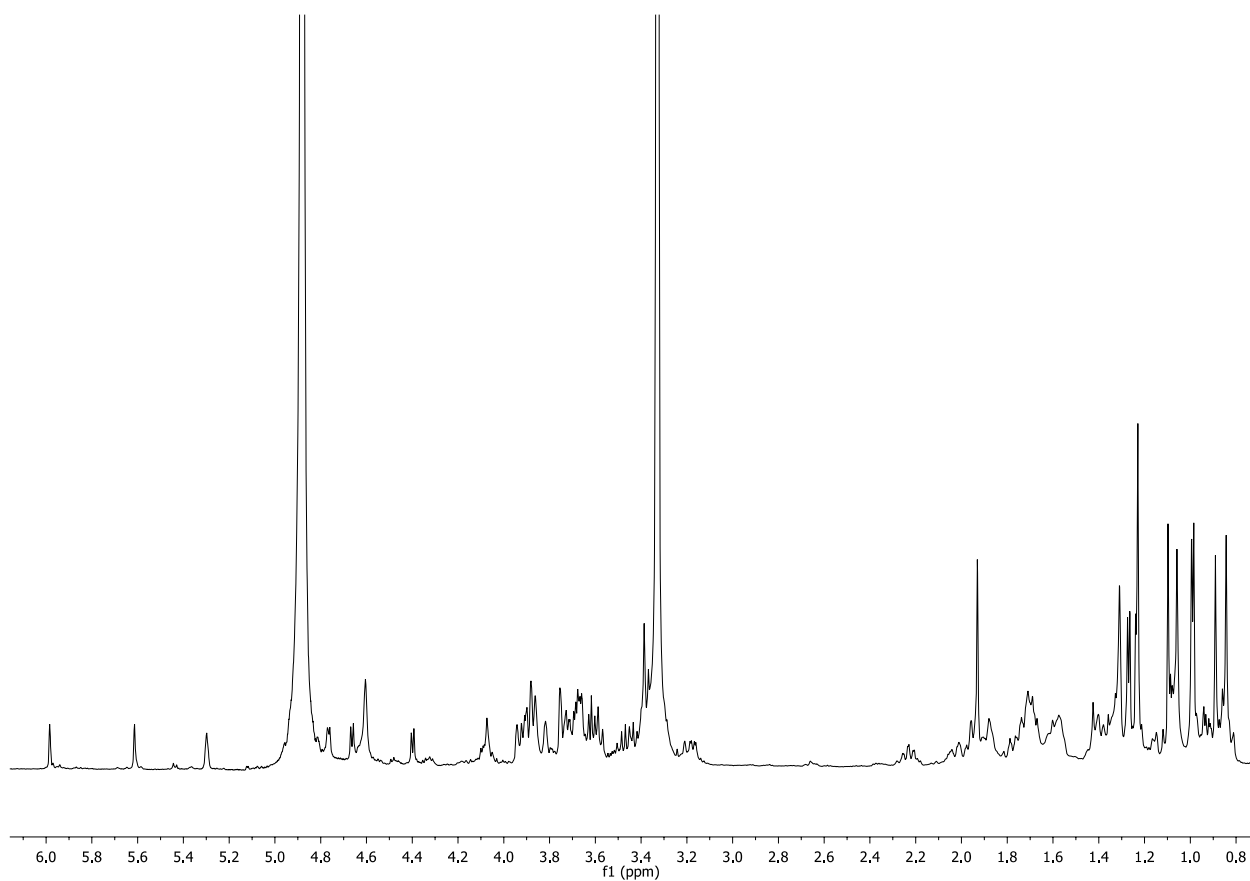

**Figure S10.**

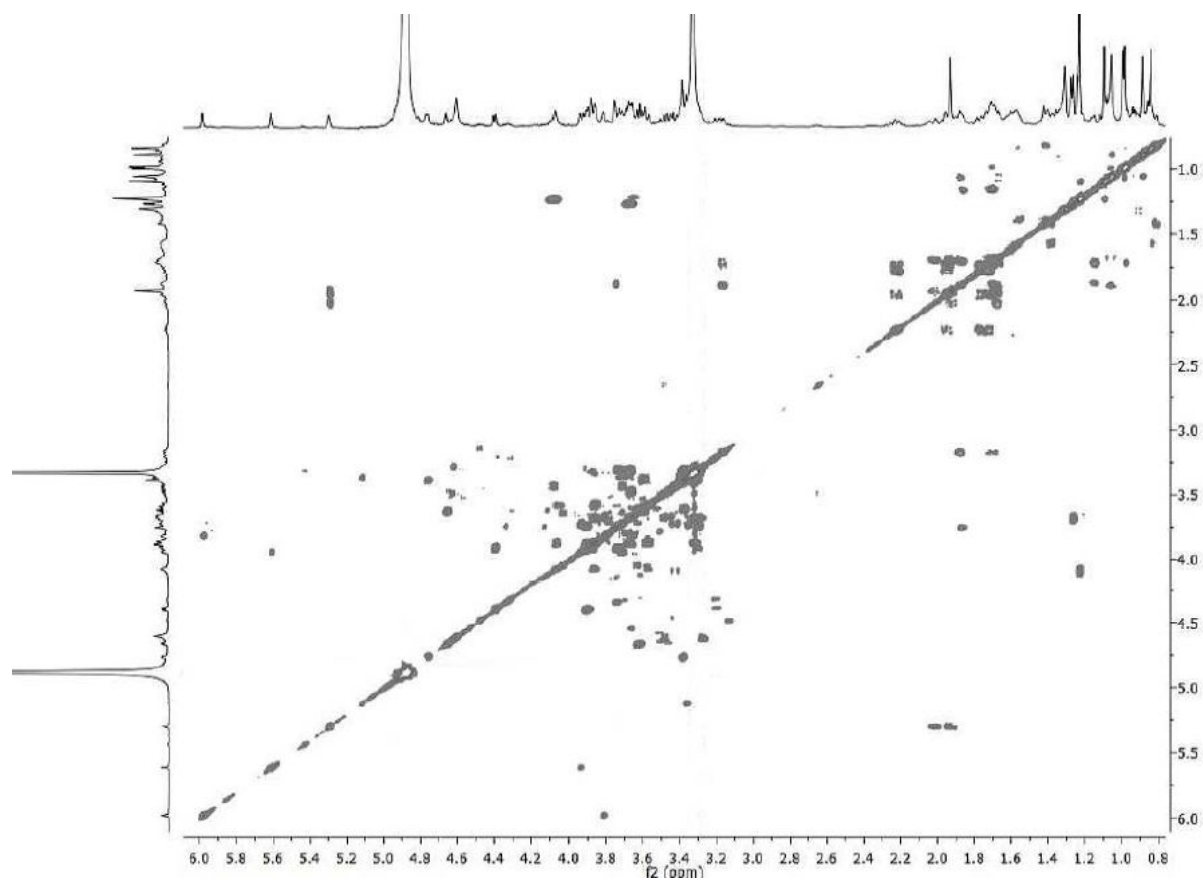

Figure S11.

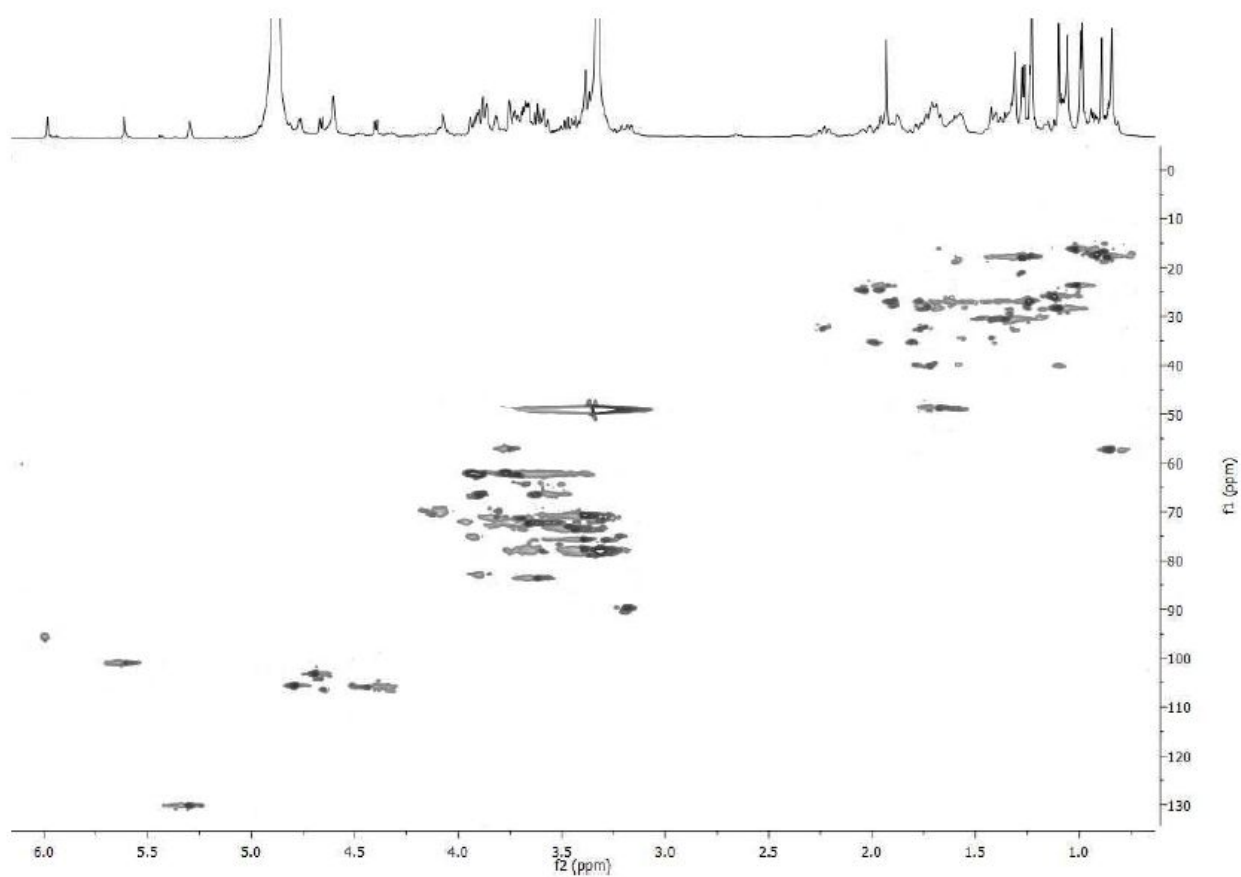

Figure S12.

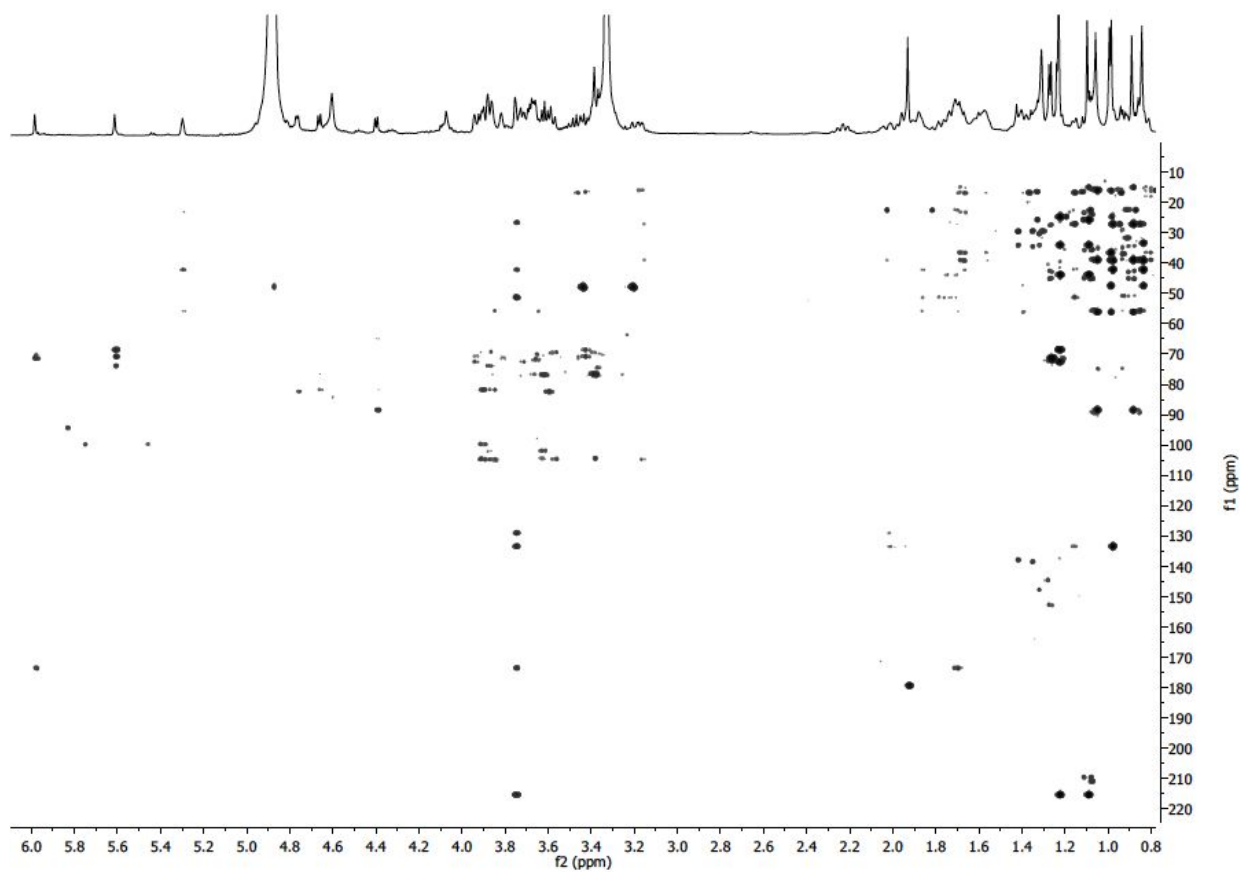



Figure S13.

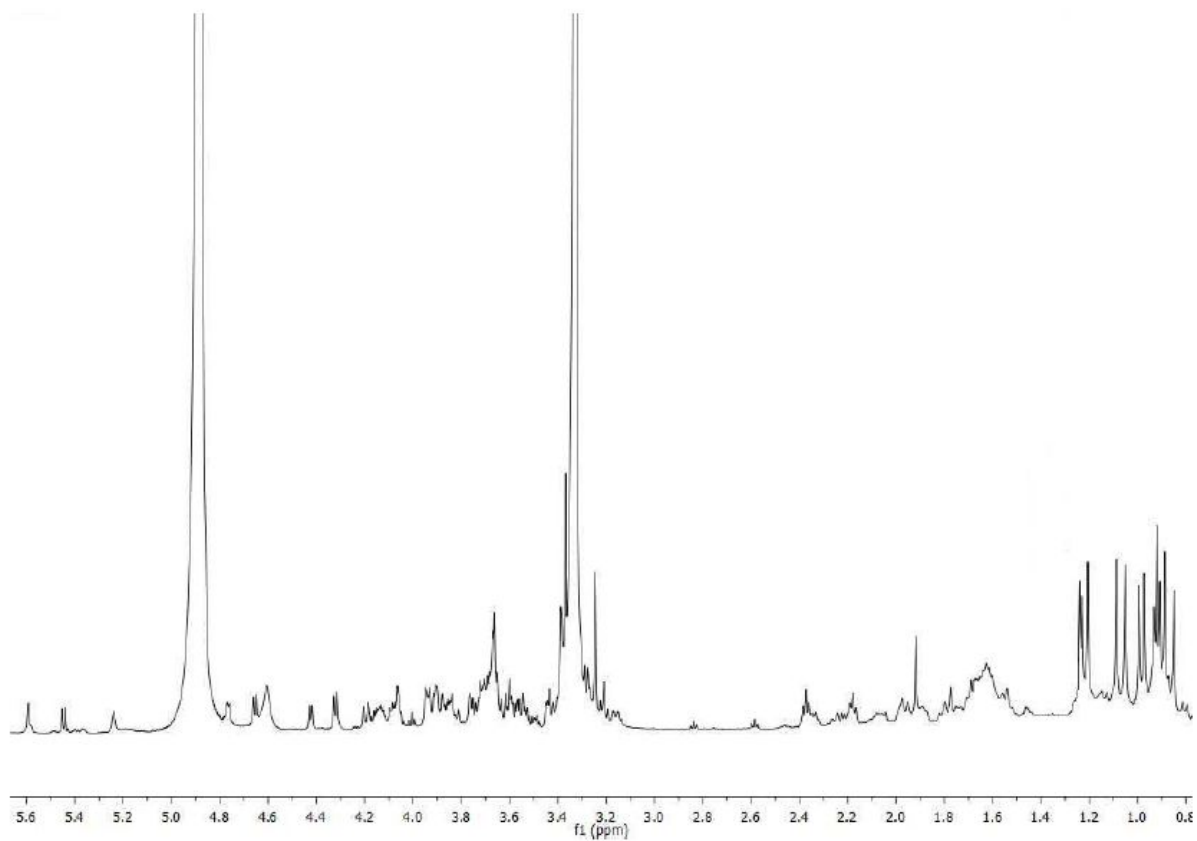

Figure S14.

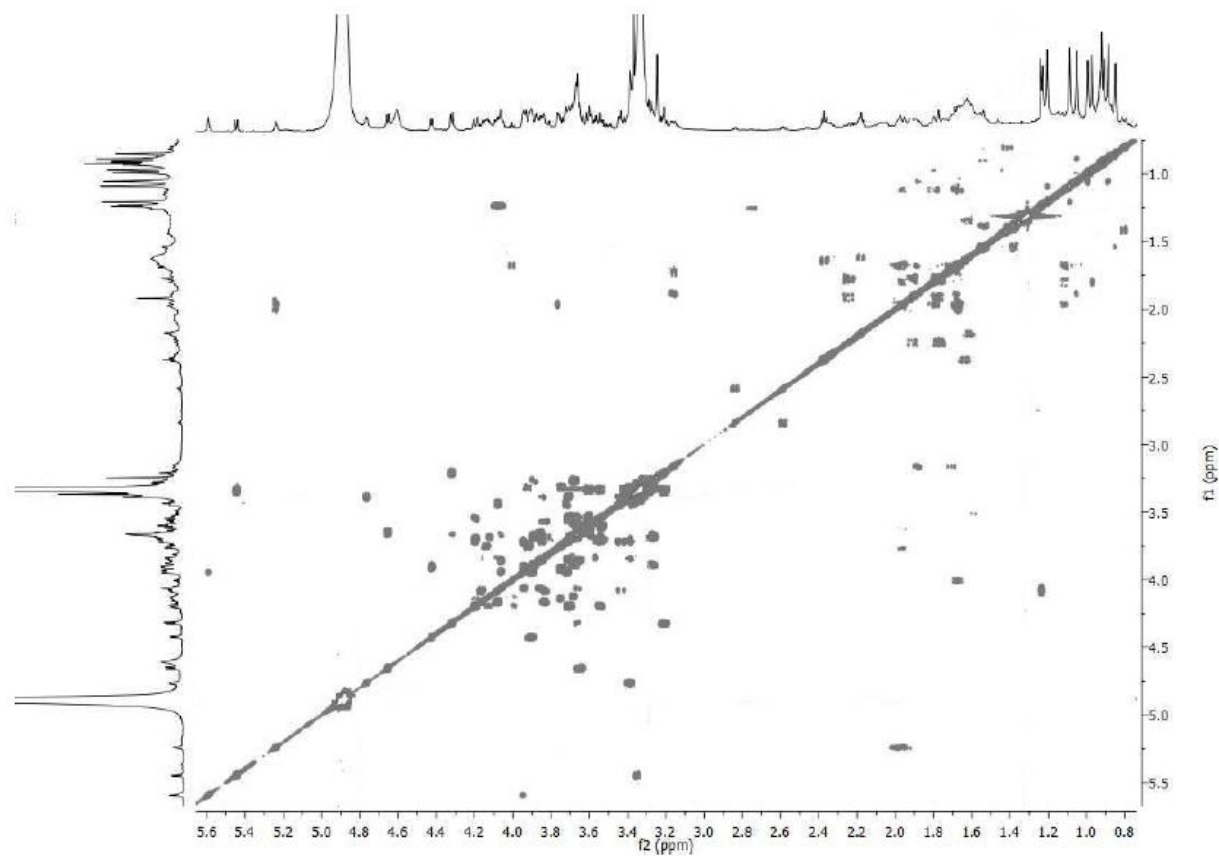

Figure S15.

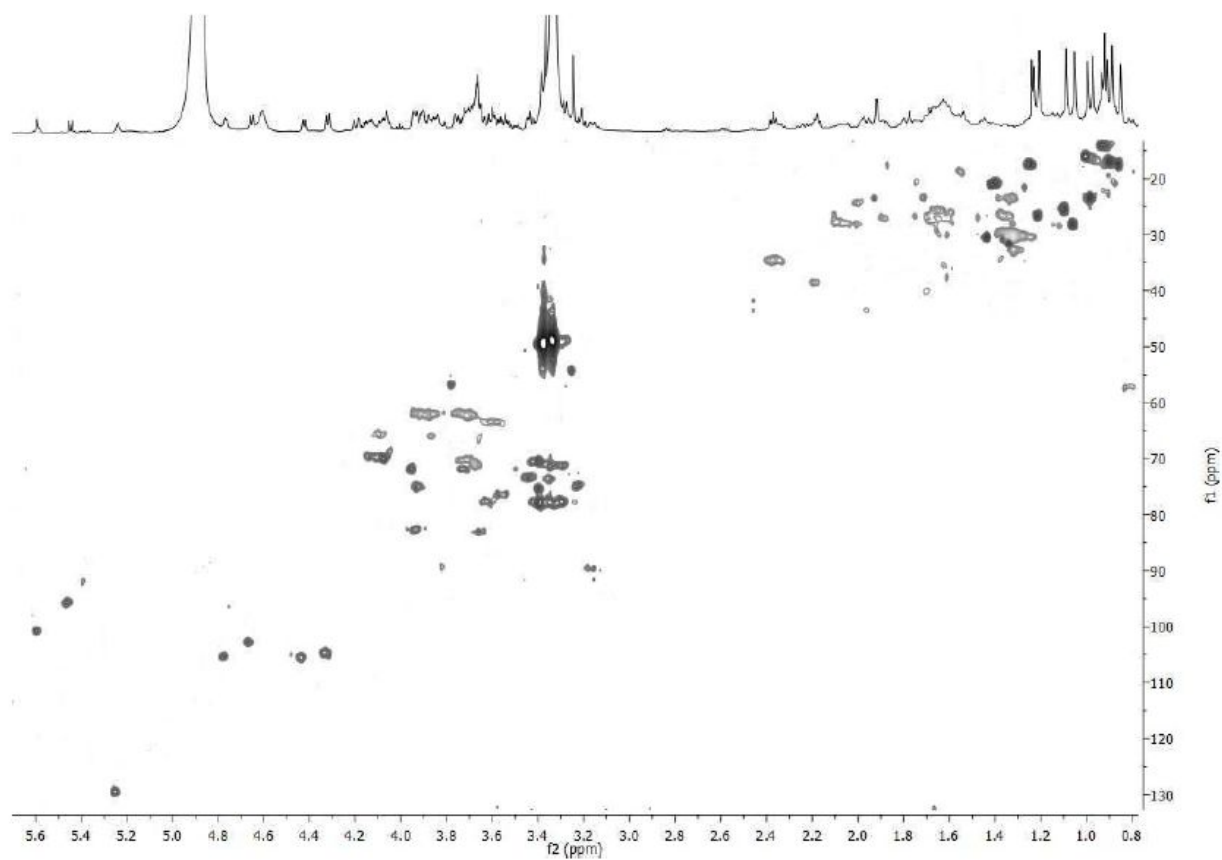

Figure S16.

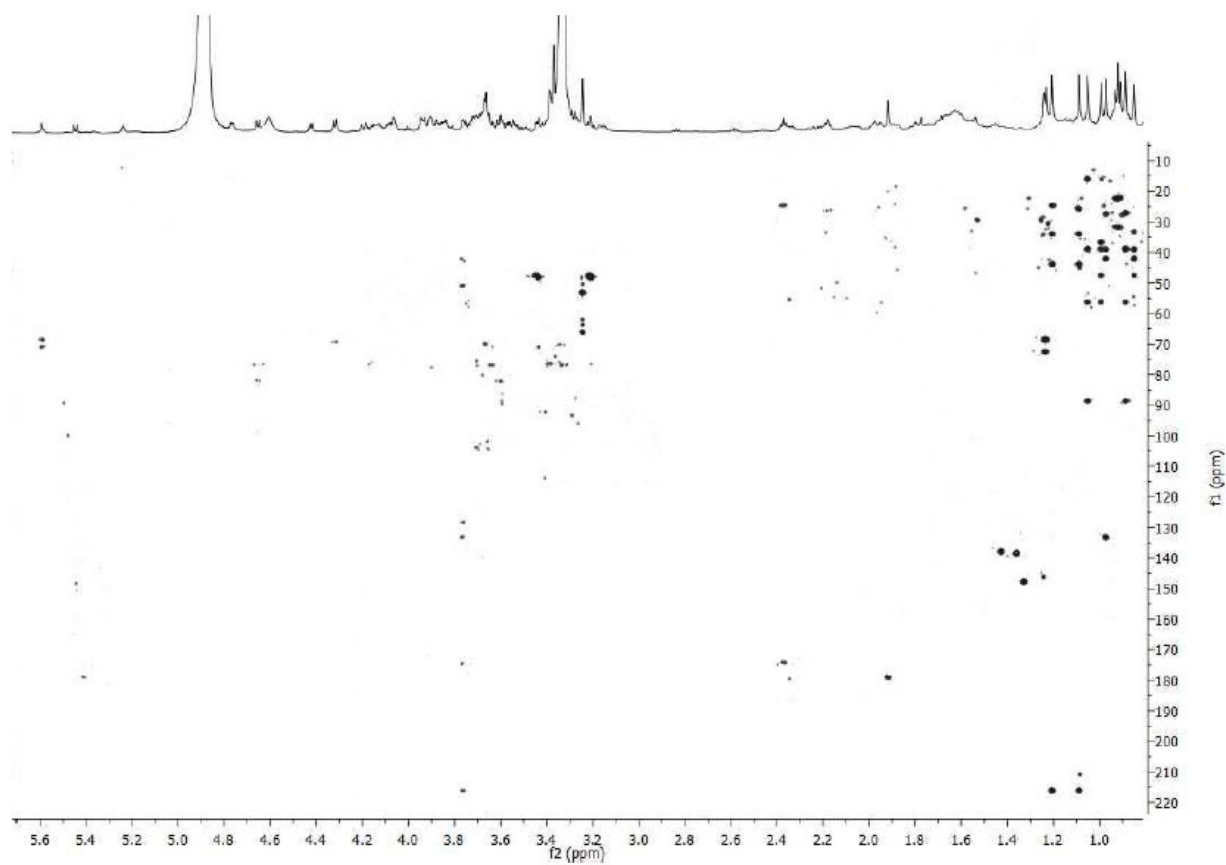

Figure S17

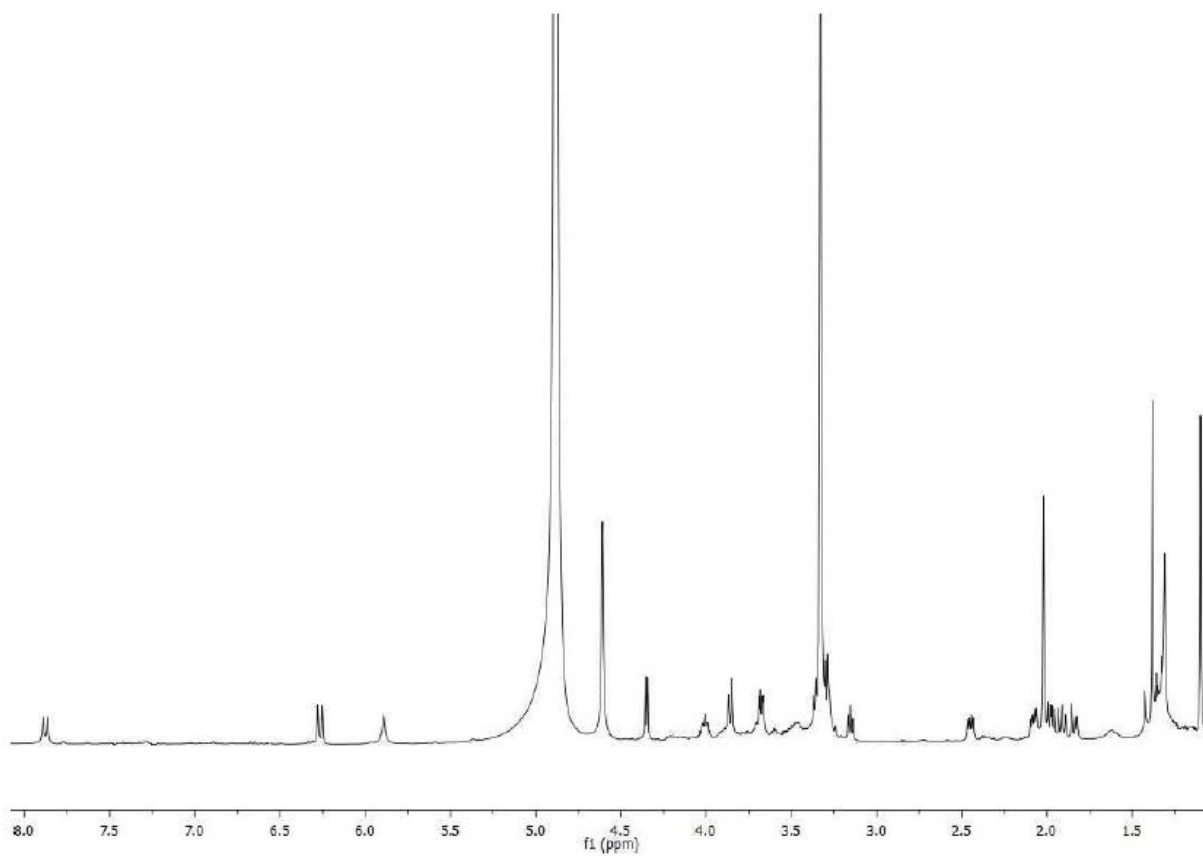

Figure S18

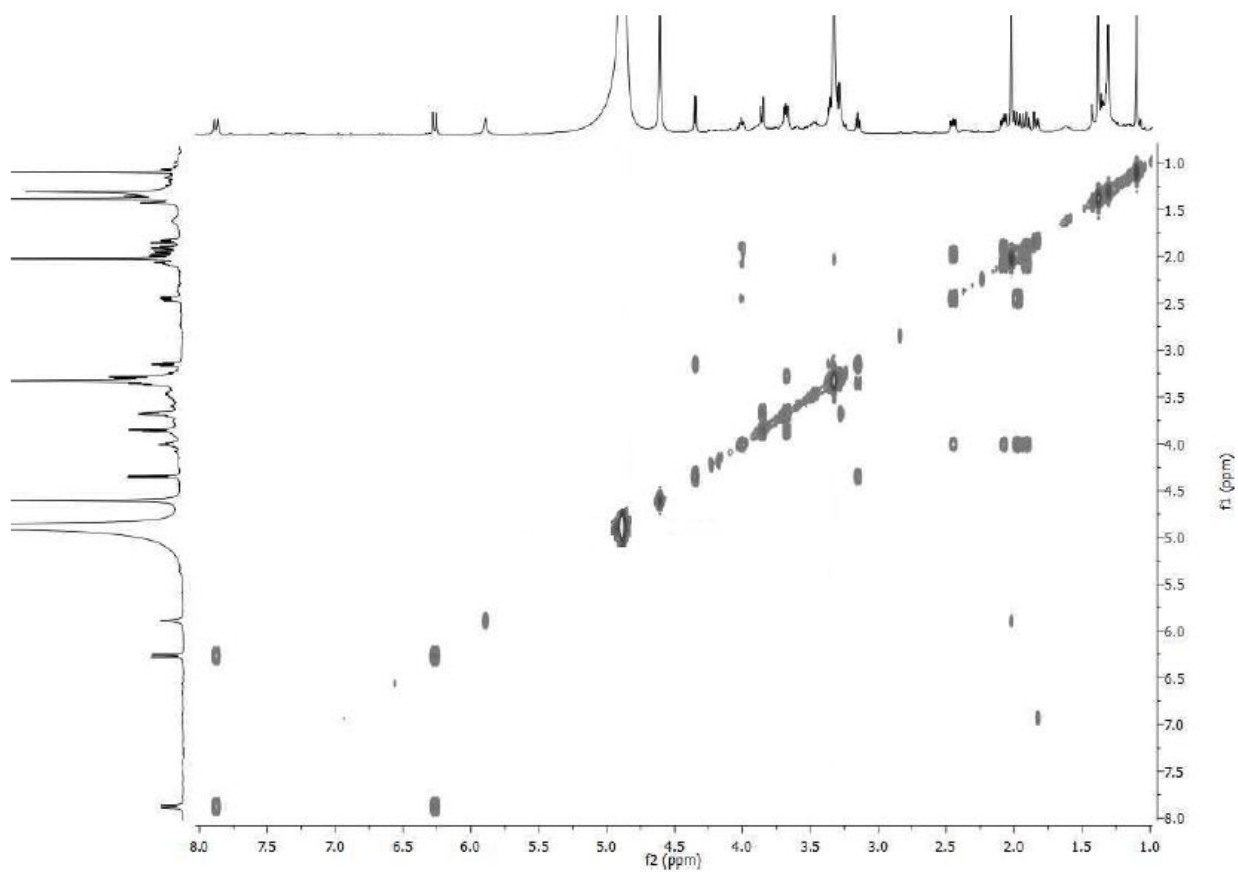

Figure S19

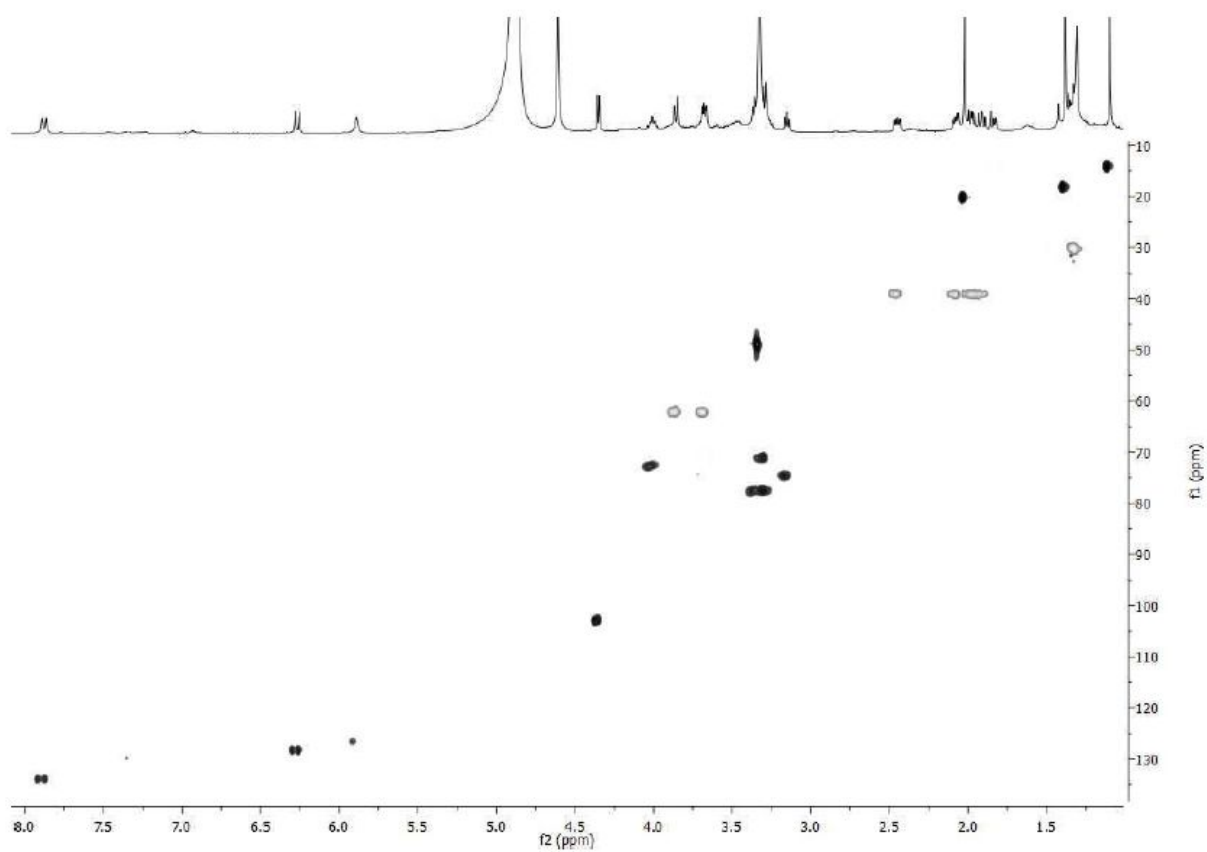

Figure S20

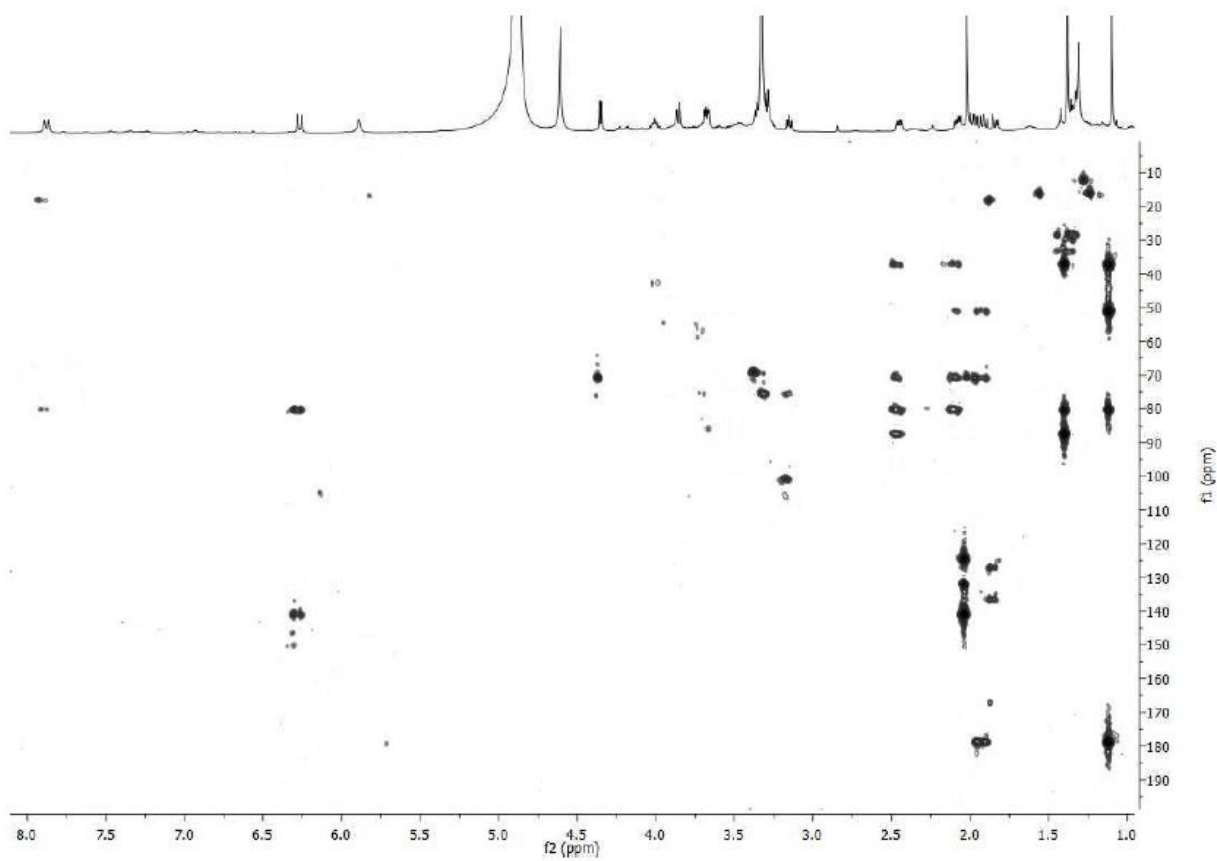

Supplement: np9b01030_si_001.pdf [file np9b01030_si_001.pdf]
